# Supplementary material for: Carbon Dot-Mediated Photodynamic Treatment Improves the Quality Attributes of Post-Harvest Goji Berries (Lycium barbarum L.) via Regulating the Antioxidant System
Source: MDPI journal article supplement (doi:10.3390/foods13060955), 2024-03-21
Supplement: s1 [file s1]

**Supplementary Table S1:** Factors and factor levels of orthogonal experiment

| Levels | Factors                                 |                                              |                 |
|--------|-----------------------------------------|----------------------------------------------|-----------------|
|        | A-Concentration<br>(g L <sup>-1</sup> ) | B-Light irradiance<br>(mW cm <sup>-2</sup> ) | C-Time<br>(min) |
| 1      | 0.05                                    | 100.00                                       | 5.00            |
| 2      | 0.10                                    | 125.00                                       | 10.00           |
| 3      | 0.15                                    | 145.00                                       | 15.00           |

**Supplementary Table S2:** Table of orthogonal experiments and experimental data.

| Experimental<br>serial numbe | Factors and levels                    |                                            |               | Experimental<br>indicators |
|------------------------------|---------------------------------------|--------------------------------------------|---------------|----------------------------|
|                              | Concentration<br>(g L <sup>-1</sup> ) | Light irradiance (mW<br>cm <sup>-2</sup> ) | Time<br>(min) | Rotting rate<br>(%)        |
| 1                            | 0.05                                  | 100.00                                     | 5.00          | 83.33                      |
| 2                            | 0.05                                  | 125.00                                     | 10.00         | 89.67                      |
| 3                            | 0.05                                  | 145.00                                     | 15.00         | 95.33                      |
| 4                            | 0.10                                  | 100.00                                     | 10.00         | 70.00                      |
| 5                            | 0.10                                  | 125.00                                     | 15.00         | 79.33                      |
| 6                            | 0.10                                  | 145.00                                     | 5.00          | 86.67                      |
| 7                            | 0.15                                  | 100.00                                     | 15.00         | 88.00                      |
| 8                            | 0.15                                  | 125.00                                     | 5.00          | 93.33                      |
| 9                            | 0.15                                  | 145.00                                     | 10.00         | 96.67                      |

**Supplementary Table S3:** Range analysis results

| Experimental<br>serial numbe         | A- Concentration | B- Light irradiance         | C-Time |
|--------------------------------------|------------------|-----------------------------|--------|
| K <sub>1</sub>                       | 268.33           | 241.33                      | 263.33 |
| K <sub>2</sub>                       | 236.00           | 262.33                      | 256.34 |
| K <sub>3</sub>                       | 278.00           | 278.67                      | 262.66 |
| k <sub>1</sub>                       | 89.44            | 80.44                       | 87.78  |
| k <sub>2</sub>                       | 78.67            | 87.44                       | 85.45  |
| k <sub>3</sub>                       | 92.67            | 92.89                       | 87.55  |
| r                                    | 14.00            | 12.45                       | 2.33   |
| Main and Secondary Factor: A > B > C |                  | Optimal combination: A2B1C2 |        |

**Supplementary Table S4:** Analysis of variance table.

| Factors | Sum of squares of deviation | Degree of freedom | Mean square deviation | F value | P value | significant difference |
|---------|-----------------------------|-------------------|-----------------------|---------|---------|------------------------|
| A       | 322.53                      | 2.00              | 161.26                | 50.21   | 0.02    | *                      |
| B       | 233.59                      | 2.00              | 116.79                | 36.36   | 0.03    | *                      |
| C       | 9.92                        | 2.00              | 4.96                  | 1.54    | 0.39    |                        |
| Error   | 6.42                        | 2.00              | 3.21                  |         |         |                        |
| Total   | 527.45                      | 9.00              | 58.61                 |         |         |                        |

Note: \* \* indicates a highly significant ( $P<0.01$ ) impact, and \* indicates a significant ( $P<0.05$ ) impact.

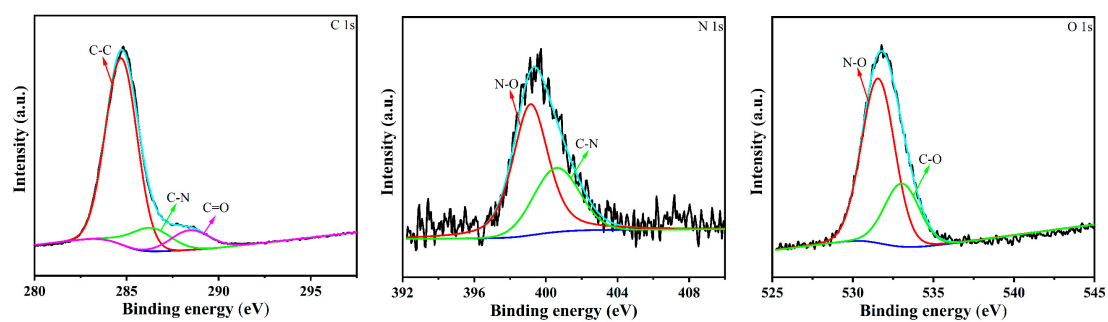

**Supplementary Figure S1:** Elemental spectra of C1s, N1s, and O1s in CDs.

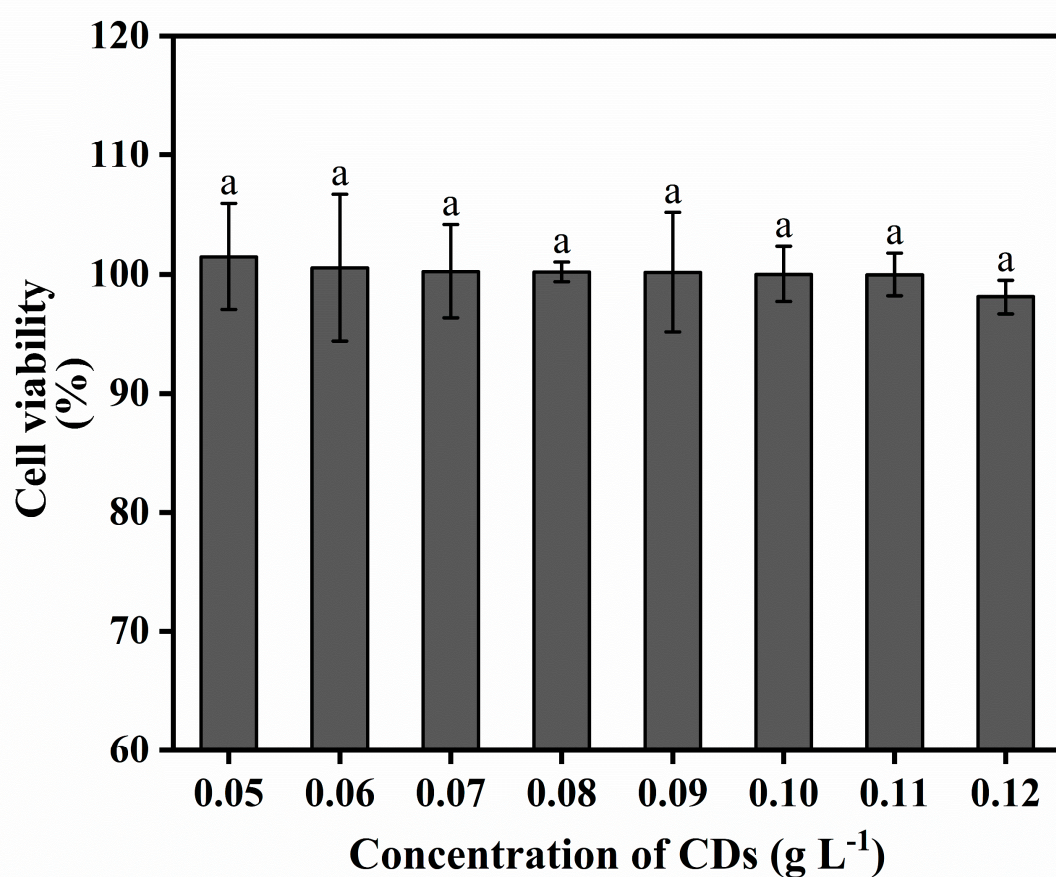

**Supplementary Figure S2:** Cytotoxicity analysis of the CDs towards L929 mouse fibroblast cell lines when exposed with varying concentrations for a 24 h period. Superscript letters of a-d in the same line represent significant differences estimated by Duncan's multiple range test ( $P < 0.05$ )
